# Supplementary material
Source: Springer Nature journal article supplement (https://www.springermedizin.de/resource/supplementary/12967_2013_1688_MOESM4_ESM.pdf/9574660)

**% CDC**

**100**  
**80**  
**60**  
**40**  
**20**  
**0**

**-**

**+**

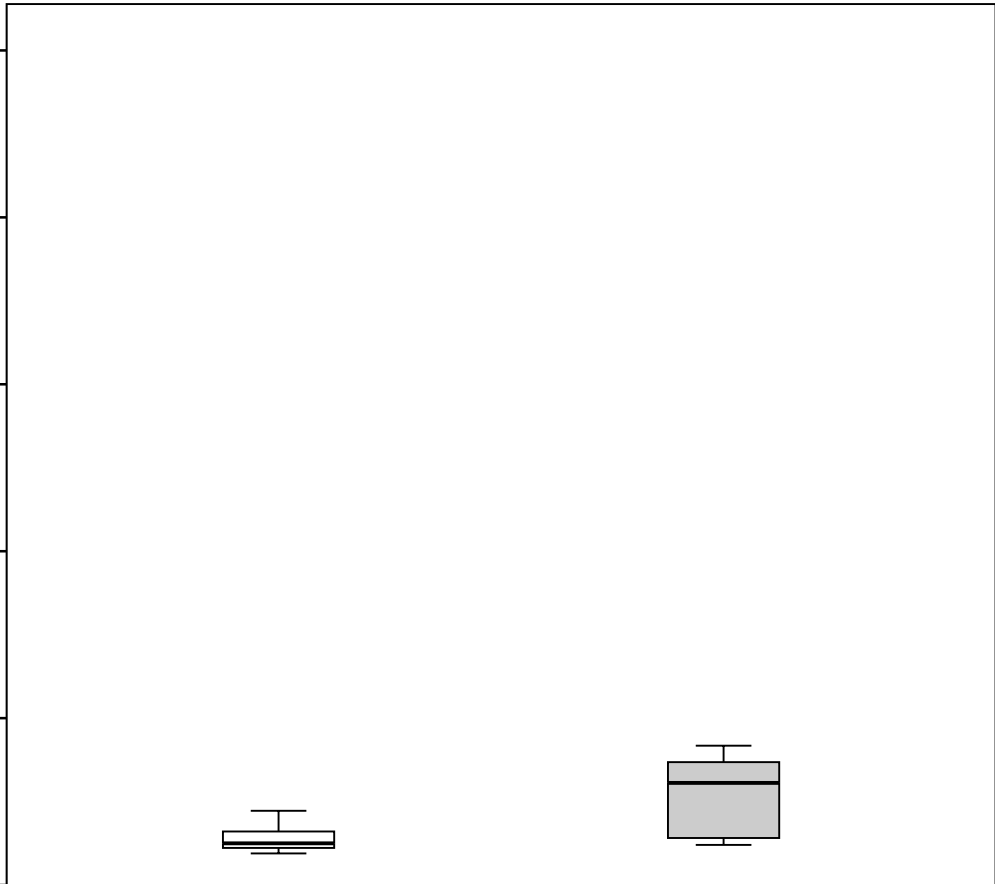

Supplement: MOESM4 [file 9574660]
